# Supplementary material for: The AXL-PYK2-PKCα axis as a nexus of stemness circuits in TNBC
Source: Life Sci Alliance. 2021 Mar 30;4(6):e202000985. doi: 10.26508/lsa.202000985 (PMC8046419; doi:10.26508/lsa.202000985)
Supplement: Supplementary file 2 [file LSA-2020-00985_TableS1.xlsx]

## Sheet: S1
Table S1: Quantification of colocalization performed for each pair using Colocalization Module of ZEN software.
	Figure	Red Signal	Green Signal	Violet Signal	PC	CC1	CC2
	4A Ctrl	AXL	pPYK2		-0.09	0.11	0.23
	4A Ctrl	AXL		LysoT	0.05	0.21	0.33
	4A Ctrl		pPYK2	LysoT	-0.05	0.01	0.07
	4A PKC_i	AXL	pPYK2		0.81	0.64	0.64
	4A PKC_i	AXL		LysoT	0.71	0.37	0.74
	4A PKC_i		pPYK2	LysoT	0.69	0.46	0.65
	4B Ctrl	AXL	Rab4		0.19	0.56	0.62
	4B PKC_i	AXL	Rab4		0.12	0.52	0.62
	4C PKC_i	AXL	Rab11		0.59	0.88	0.96
	4C PKC_i	AXL	CD9		0.66	0.69	0.8
	4C PKC_i	AXL	CD63		0.82	0.78	0.54
	4D PKC_i	pPYK2	CD9		0.89	0.71	0.78
	S5A Ctrl	AXL	EEA1		-0.01	0.25	0.2
	S5A PKC_i	AXL	EEA1		-0.07	0.16	0.16
	S5A PKC_i	pPYK2	EEA1		-0.14	0.15	0.23
	Representative values from quantification of colocalization for each pair from individual panels of Fig 4A and S5A are presented.
	pPYK2 = phospho-PYK2 (Y402)
	LysoT = LysoTracker Red-DND-99
	PKC_i = PKC inhibitor (RO-31-8220) treatment for 2 hr.
	PC = Pearson’s coefficient, where its values range from -1 (an inverse or “anti-colocalization” relationship), to 0 (a random cloud of no relationship), or +1 (a perfect linear slope).
	CC1 = Colocalization coefficient 1, fraction of pixels from first channel (left column) overlapping with those of second channel (right column), value ranging from 0 to 1.
	CC2 = Colocalization coefficient 2, fraction of pixels from second channel (right column) overlapping with those of first channel (left column) , value ranging from 0 to 1.
